# Supplementary material
Source: HighWire-hosted journal article supplement (https://erj.ersjournals.com/content/50/3/1602221)
Supplement: inline-supplementary-material-1 [file inline-supplementary-material-1.pdf]

## Online Supplement A: Search terms used

### PubMed:

English[lang]

#### MeSH Terms used:

"humans"  
"vocal cord dysfunction"  
"dyskinesias"  
"spasm"  
"laryngismus"  
"larynx"  
"motion"  
"movement"  
"inhalation"  
"respiratory sounds"  
"vocal cord paralysis"  
"dyspnea"  
"irritants"  
"vocal cords"  
"syndrome"  
"vocal cord dysfunction"

#### Free text terms used:

"adduction"  
"bilateral"  
"breathlessness"  
"cords"  
"cord"  
"dysfunction"  
"dyskinesias"  
"dyskinesia"  
"dyspnea"  
"e-ilo"  
"eiis"  
"eilo"  
"emotional laryngeal wheezing"  
"episodic dysfunction"  
"episodic laryngeal dyskinesia"  
"episodic"  
"exercise-induced laryngeal obstruction"  
"exercise-induced laryngomalacia"  
"exercise-induced paradoxical vocal fold motion"  
"exercise-induced stridor"  
"exercise-induced"  
"factitious asthma"  
"factitious"  
"functional laryngeal dyskinesia"  
"functional laryngeal obstruction"  
"functional laryngeal stridor"  
"functional paralysis"  
"functional stridor"  
"functional upper airway obstruction"  
"functional upper airways obstruction"  
"functional"  
"hysterical stridor"  
"hysterical"  
"ilo"  
"inducible"  
"inhalation"  
"inspiratory"  
"intermittent"  
"irritant-associated"  
"irritants"  
"irritant"  
"laryngeal obstruction"  
"laryngeal spasm"  
"laryngeal"  
"laryngismus"  
"laryngospasm"  
"larynx"  
"malfunction"  
"motion"  
"movement"  
"nonorganic upper airway obstruction"  
"nonorganic"  
"obstruction"  
"paradoxical vocal fold"  
"paradoxical"  
"paradoxical"  
"paralysis"  
"paroxysmal"  
"physiopathology"  
"psychogenic pharyngeal constriction"  
"psychogenic respiratory distress"  
"psychogenic stridor"  
"psychogenic upper airway obstruction"  
"psychogenic vocal cord dysfunction"  
"recurrent laryngospasm"  
"recurrent"  
"respiratory sounds"  
"respiratory"  
"sounds"  
"spasmodic croup"  
"spasm"  
"stridor"  
"syndrome"  
"upper airway obstruction"  
"variable"  
"variable"  
"vcd"  
"vocal cord dysfunction"  
"vocal cord malfunction"  
"vocal cord paralysis"  
"vocal cords"  
"vocal-cord dysfunction"  
"vocal"

## Cochrane database:

"adduction"  
"bilateral vocal cord dysfunction"  
"dyskinesia"  
"eilo"  
"emotional laryngeal wheezing"  
"episodic dysfunction"  
"episodic laryngeal dyskinesia"  
"episodic paroxysmal laryngospasm"  
"exercise-induced laryngeal dysfunction"  
"exercise-induced laryngeal obstruction"  
"exercise-induced laryngomalacia"  
"exercise-induced paradoxical vocal fold motion"  
"exercise-induced stridor"  
"factitious asthma"  
"factitious malfunction"  
"functional laryngeal dyskinesia"  
"functional laryngeal obstruction"  
"functional laryngeal stridor"  
"functional paralysis"  
"functional stridor"  
"functional upper airway obstruction"  
"functional upper airways obstruction"  
"functional vocal cord paralysis"  
"hysterical stridor" "  
"inducible paradoxical motion"  
"inducible paradoxical movement"  
"intermittent"  
"irritant"  
"irritant-associated"  
"laryngeal obstruction"  
"laryngeal spasm"  
"nonorganic obstruction"  
"nonorganic upper airway obstruction"  
"obstruction"  
"paradoxical vocal cord"  
"paradoxical vocal cord adduction"  
"paradoxical vocal cord motion"  
"paradoxical vocal cord movement"  
"paradoxical vocal fold dysfunction"  
"paradoxical"  
"psychogenic pharyngeal constriction"  
"psychogenic respiratory distress"  
"psychogenic stridor"  
"psychogenic upper airway obstruction"  
"psychogenic vocal cord dysfunction"  
"recurrent laryngeal dysfunction"  
"recurrent laryngospasm"  
"spasm"  
"spasmodic croup"  
"syndrome"  
"upper airway obstruction"  
"variable laryngeal dyskinesia"  
"variable vocal cord dysfunction"  
"vcd"  
"vocal cord dysfunction"  
hysterical intermittent breathlessness"

### **Online Supplement B: Complete reference list (alphabetically):**

- Allan, P. F., Abouchahine, S., Harvis, L., & Morris, M. J. (2006). Progressive vocal cord dysfunction subsequent to a chlorine gas exposure. *Journal of Voice*, 20(2), 291–296. <http://doi.org/10.1016/j.jvoice.2005.04.003>
- Altman, K. W., Mirza, N., Ruiz, C., & Sataloff, R. T. (2000). Paradoxical vocal fold motion: presentation and treatment options. *Journal of Voice*, 14(1), 99–103.
- Anbar, R. D. (2002). Hypnosis in pediatrics: applications at a pediatric pulmonary center. *BMC Pediatrics*, 2(1), 11. <http://doi.org/10.1186/1471-2431-2-11>
- Anbar, R. D., & Hehir, D. A. (2000a). Hypnosis as a Diagnostic Modality for Vocal Cord Dysfunction, 106(6), e81–e81. <http://doi.org/10.1542/peds.106.6.e81>
- Anbar, R. D., & Hehir, D. A. (2000b). Hypnosis as a diagnostic modality for vocal cord dysfunction. *Pediatrics*, 106(6), E81.
- Andersen, T., Sandnes, A., Hilland, M., Halvorsen, T., Fondenes, O., Heimdal, J.-H., et al. (2013). Laryngeal response patterns to mechanical insufflation-exsufflation in healthy subjects. *American Journal of Physical Medicine & Rehabilitation / Association of Academic Physiatrists*, 92(10), 920–929. <http://doi.org/10.1097/PHM.0b013e3182a4708f>
- Appelblatt, N. H., & Baker, S. R. (1981). Functional upper airway obstruction. A new syndrome. *Archives of Otolaryngology (Chicago, Ill. : 1960)*, 107(5), 305–306. Retrieved from <http://eutils.ncbi.nlm.nih.gov/entrez/eutils/elink.fcgi?dbfrom=pubmed&id=7224951&retmode=ref&cmd=prlinks>
- Archer, G. J., Hoyle, J. L., McCluskey, A., & Macdonald, J. (2000). Inspiratory vocal cord dysfunction, a new approach in treatment. *European Respiratory Journal*, 15(3), 617. <http://doi.org/10.1034/j.1399-3003.2000.15.30.x>
- Bahrainwala, A. H., Simon, M. R., Harrison, D. D., Toder, D., & Secord, E. A. (2001). Atypical expiratory flow volume curve in an asthmatic patient with vocal cord dysfunction. *Annals of Allergy, Asthma & Immunology*, 86(4), 439–443. [http://doi.org/10.1016/S1081-1206\(10\)62492-1](http://doi.org/10.1016/S1081-1206(10)62492-1)
- Balasubramaniam, S. K., O'CONNELL, E. J., Sachs, M. I., & SANDERSON, D. R. (1986). Recurrent exercise-induced stridor in an adolescent. *Ann Allergy*, 57(4), 243–247.
- Barnes, S. D., Grob, C. S., Lachman, B. S., Marsh, B. R., & Loughlin, G. M. (1986). Psychogenic upper airway obstruction presenting as refractory wheezing. *The Journal of Pediatrics*, 109(6), 1067–1070.
- Baxter, M., Uddin, N., Raghav, S., Leong, P., Low, K., Hamza, K., et al. (2014). Abnormal vocal cord movement treated with botulinum toxin in patients with asthma resistant to optimised management. *Respirology (Carlton, Vic.)*, 19(4), 531–537. <http://doi.org/10.1111/resp.12271>
- Bikov, A., Pride, N. B., Goldman, M. D., Hull, J. H., Horvath, I., Barnes, P. J., et al. (2015). Glottal Aperture and Buccal Airflow Leaks Critically Affect Forced Oscillometry Measurements. *Chest*, 148(3), 731–738. <http://doi.org/10.1378/chest.14-2644>
- Bittleman, D. B., Smith, R. J. H., & Weiler, J. M. (1994). Abnormal Movement of the Arytenoid Region During Exercise Presenting as Exercise-induced Asthma in an Adolescent Athlete, 106(2), 615–616.
- Björnsdóttir, U. S., Gudmundsson, K., Hjartarson, H., Bröndbo, K., Magnússon, B., & Juliusson, S. (2000). Exercise-induced laryngomalacia: an imitator of exercise-induced bronchospasm. *Annals of Allergy, Asthma & Immunology*, 85(5), 387–391. [http://doi.org/10.1016/S1081-1206\(10\)62552-5](http://doi.org/10.1016/S1081-1206(10)62552-5)
- Borer, H., Hänni, P., & Schoenenberger, R. A. (2001). Vocal cord dysfunction: an important differential diagnosis of brittle asthma. *Respiration; International Review of Thoracic Diseases*, 68(3), 318.
- Boris, M., Goldblatt, A., & Krigsman, A. (2002). Laryngeal dysfunction: a common cause of respiratory distress, often misdiagnosed as asthma and responsive to antireflux therapy. *Allergy and Asthma Proceedings : the Official Journal of Regional and State Allergy Societies*, 23(2), 133–139.

- Caraon, P., & O'Toole, C. (1991). Vocal cord dysfunction presenting as asthma. *Irish Medical Journal*, 84(3), 98–99. Retrieved from <http://eutils.ncbi.nlm.nih.gov/entrez/eutils/efetch.fcgi?dbfrom=pubmed&id=1791128&retmode=ref&cmd=prlinks>
- Carroll, L. M., & Tan, M. (2015). Aerodynamic measures and biofeedback as management in persistent paradoxical vocal fold motion and reverse phonation. *Journal of Voice : Official Journal of the Voice Foundation*, 29(2), 218–222. <http://doi.org/10.1016/j.jvoice.2014.07.018>
- Chatzoudis, D., Kelly, T. J., Lancaster, J., & Jones, T. M. (2015). Upper airway obstruction in a patient with Ehlers-Danlos syndrome. *Annals of the Royal College of Surgeons of England*, 97(3), e50–1. <http://doi.org/10.1308/003588414X14055925061793>
- Chawla, S. S., Upadhyay, B. K., & MacDonnell, K. F. (1984). Laryngeal spasm mimicking bronchial asthma. *Ann Allergy*, 53(4), 319–321.
- Chen, Y., Maksym, G., Brown, T., & Deng, L. (2013). Determination of glottic opening fluctuation by a new method based on nasopharyngoscopy. *The Chinese Journal of Physiology*, 56(1), 52–57. <http://doi.org/10.4077/CJP.2013.BAA072>
- Cheng, Y. S., Bhutta, M. F., Ramsden, J. D., & Lennox, P. (2014). Periodic botulinum toxin injections for paradoxical vocal fold motion in a child with cerebral palsy: a case study. *International Journal of Pediatric Otorhinolaryngology*, 78(3), 570–571. <http://doi.org/10.1016/j.ijporl.2013.12.037>
- Chiu, C. Y., Wong, K. S., & Huang, J. L. (2001). Paradoxical vocal cord adduction mimicking as acute asthma in a pediatric patient. *Asian Pacific Journal of Allergy and Immunology / Launched by the Allergy and Immunology Society of Thailand*, 19(1), 55–58.
- Christensen, P. M., & Rasmussen, N. (2013). Eucapnic voluntary hyperventilation in diagnosing exercise-induced laryngeal obstructions. *European Archives of Oto-Rhino-Laryngology : Official Journal of the European Federation of Oto-Rhino-Laryngological Societies (EUFOS) : Affiliated with the German Society for Oto-Rhino-Laryngology - Head and Neck Surgery*, 270(12), 3107–3113. <http://doi.org/10.1007/s00405-013-2571-4>
- Christensen, P. M., Maltbaek, N., Jorgensen, I. M., & Nielsen, K. G. (2013). Can flow-volume loops be used to diagnose exercise induced laryngeal obstructions? A comparison study examining the accuracy and inter-rater agreement of flow volume loops as a diagnostic tool. *Primary Care Respiratory Journal : Journal of the General Practice Airways Group*, 22(3), 306–311. <http://doi.org/10.4104/pcrj.2013.00067>
- Christensen, P. M., Thomsen, S. F., Rasmussen, N., & Backer, V. (2011). Exercise-induced laryngeal obstructions: prevalence and symptoms in the general public. *European Archives of Oto-Rhino-Laryngology : Official Journal of the European Federation of Oto-Rhino-Laryngological Societies (EUFOS) : Affiliated with the German Society for Oto-Rhino-Laryngology - Head and Neck Surgery*, 268(9), 1313–1319. <http://doi.org/10.1007/s00405-011-1612-0>
- Christensen, P., Thomsen, S. F., Rasmussen, N., & Backer, V. (2010). Exercise-induced laryngeal obstructions objectively assessed using EILOMEA. *European Archives of Oto-Rhino-Laryngology : Official Journal of the European Federation of Oto-Rhino-Laryngological Societies (EUFOS) : Affiliated with the German Society for Oto-Rhino-Laryngology - Head and Neck Surgery*, 267(3), 401–407. <http://doi.org/10.1007/s00405-009-1113-6>
- Christopher, K. L., Wood, R. P., Eckert, R. C., Blager, F. B., Raney, R. A., & Souhrada, J. F. (1983). Vocal-cord dysfunction presenting as asthma. *The New England Journal of Medicine*, 308(26), 1566–1570. <http://doi.org/10.1056/NEJM198306303082605>
- Chung, K. F. (1982). Laryngeal stridor during acute asthma. *The Lancet*, 2(8301), 767.
- Clinical Conferences at The Johns Hopkins Hospital. Upper airway obstruction in asthma. (1980). *Clinical Conferences at The Johns Hopkins Hospital. Upper airway obstruction in asthma. The Johns Hopkins Medical Journal*, 147(6), 233–237.
- Collett, P. W., Brancatisano, T., & Engel, L. A. (1983). Spasmodic croup in the adult. *Am Rev Respir Dis*, 127(4), 500–504. <http://doi.org/10.1164/arrd.1983.127.4.500>
- Corren, J., & Newman, K. B. (1992). Vocal cord dysfunction mimicking bronchial asthma. *Postgraduate Medicine*, 92(6), 153–156. Retrieved from <http://eutils.ncbi.nlm.nih.gov/entrez/eutils/efetch.fcgi?dbfrom=pubmed&id=1437901&retmode=ref&cmd=prlinks>

- Couser, J. I., & Berman, J. S. (1989). Respiratory muscle fatigue from functional upper airway obstruction. *Chest*, 96(3), 689–690. <http://doi.org/10.1378/chest.96.3.689>
- Craig, T., Sitz, K., Squire, E., Smith, L., & Carpenter, G. (1992). Vocal cord dysfunction during wartime. *Military Medicine*, 157(11), 614–616. Retrieved from <http://eutils.ncbi.nlm.nih.gov/entrez/eutils/elink.fcgi?dbfrom=pubmed&id=1470359&retmode=ref&cmd=prlinks>
- Cummings, K. J., Fink, J. N., Vasudev, M., Piacitelli, C., & Kreiss, K. (2013). Vocal cord dysfunction related to water-damaged buildings. *The Journal of Allergy and Clinical Immunology. in Practice*, 1(1), 46–50. <http://doi.org/10.1016/j.jaip.2012.10.001>
- Cunningham, M. J., Eavey, R. D., & Shannon, D. C. (1985). Familial vocal cord dysfunction. *Pediatrics*, 76(5), 750–753.
- Daminda, D. A. D. G., Jayasooriya, C., & Wijekoon, P. N. B. (2007). Refractory wheezing: paradoxical vocal cord motion. *The Ceylon Medical Journal*, 52(4), 137–138.
- de Benedictis, F. M., de Benedictis, D., Mirabile, L., Pozzi, M., Guerrieri, A., & Di Pillo, S. (2015). Ground zero: not asthma at all. *Pediatric Allergy and Immunology : Official Publication of the European Society of Pediatric Allergy and Immunology*, 26(6), 490–496. <http://doi.org/10.1111/pai.12421>
- De Guzman, V., Ballif, C. L., Maurer, R., Hartnick, C. J., & Raol, N. (2014). Validation of the dyspnea index in adolescents with exercise-induced paradoxical vocal fold motion. *JAMA Otolaryngology-- Head & Neck Surgery*, 140(9), 823–828. <http://doi.org/10.1001/jamaoto.2014.1405>
- Dinulos, J. G., Karas, D. E., Carey, J. P., & Del Beccaro, M. A. (1997). Paradoxical vocal cord motion presenting as acute stridor. *Annals of Emergency Medicine*, 29(6), 815–817. Retrieved from <http://eutils.ncbi.nlm.nih.gov/entrez/eutils/elink.fcgi?dbfrom=pubmed&id=9174531&retmode=ref&cmd=prlinks>
- Downing, E. T., Braman, S. S., Fox, M. J., & Corrao, W. M. (1982). Factitious Asthma: Physiological Approach to Diagnosis. *Jama*, 248(21), 2878–2881. <http://doi.org/10.1001/jama.1982.03330210060036>
- Echternach, M., Delb, W., Verse, T., & Richter, B. (2008). Does isolated expiratory vocal cord dysfunction exist? *Otolaryngology - Head and Neck Surgery*, 138(6), 805–806. <http://doi.org/10.1016/j.otohns.2007.12.042>
- Elshami, A. A., & Tino, G. (1996). Coexistent Asthma and Functional Upper Airway Obstruction : Case Reports and Review of the Literature, 110(5), 1358–1361. <http://doi.org/10.1378/chest.110.5.1358>
- Fahey, J. T., Bryant, N. J., Karas, D., Goldberg, B., DeStefano, R., & Gracco, L. C. (2005). Exercise-induced stridor due to abnormal movement of the arytenoid area: videoendoscopic diagnosis and characterization of the “at risk” group. *Pediatric Pulmonology*, 39(1), 51–55. <http://doi.org/10.1002/ppul.20076>
- Falco, D. A., Hammer, G. B., Conrad, C., & Messner, A. H. (2002). Paradoxical vocal cord motion in a child presenting with cyanosis and respiratory failure. *Pediatric Critical Care Medicine : a Journal of the Society of Critical Care Medicine and the World Federation of Pediatric Intensive and Critical Care Societies*, 3(2), 185–186.
- Ferris, R. L., Eisele, D. W., & Tunkel, D. E. (1998). Functional laryngeal dyskinesia in children and adults. *The Laryngoscope*, 108(10), 1520–1523. Retrieved from <http://eutils.ncbi.nlm.nih.gov/entrez/eutils/elink.fcgi?dbfrom=pubmed&id=9778293&retmode=ref&cmd=prlinks>
- Fields, C. L., Roy, T. M., & Ossorio, M. A. (1992). Variable vocal cord dysfunction: an asthma variant. *Southern Medical Journal*, 85(4), 422–424. Retrieved from <http://eutils.ncbi.nlm.nih.gov/entrez/eutils/elink.fcgi?dbfrom=pubmed&id=1566147&retmode=ref&cmd=prlinks>
- Forrest, L. A., Husein, T., & Husein, O. (2012). Paradoxical vocal cord motion: classification and treatment. *The Laryngoscope*, 122(4), 844–853. <http://doi.org/10.1002/lary.23176>
- Fowler, S. J., Thurston, A., Chesworth, B., Cheng, V., Constantinou, P., Vyas, A., et al. (2015). The VCDQ--a Questionnaire for symptom monitoring in vocal cord dysfunction. *Clinical and Experimental Allergy : Journal of the British Society for Allergy and Clinical Immunology*, 45(9), 1406–1411. <http://doi.org/10.1111/cea.12550>
- Frank-Ito, D. O., Schulz, K., Vess, G., & Witsell, D. L. (2015). Changes in aerodynamics during vocal cord dysfunction. *Computers in Biology and Medicine*, 57, 116–122. <http://doi.org/10.1016/j.combiomed.2014.12.004>

- Galdi, E., Perfetti, L., Pagella, F., Bertino, G., Ferrari, M., & Moscato, G. (2005). Irritant vocal cord dysfunction at first misdiagnosed as reactive airway dysfunction syndrome. *Scandinavian Journal of Work, Environment & Health*, 31(3), 224–226.
- Gallena, S. J. K., Solomon, N. P., Johnson, A. T., Vossoughi, J., & Tian, W. (2015). The Effect of Exercise on Respiratory Resistance in Athletes With and Without Paradoxical Vocal Fold Motion Disorder. *American Journal of Speech-Language Pathology*, 24(3), 470–479. [http://doi.org/10.1044/2015\\_AJSLP-14-0110](http://doi.org/10.1044/2015_AJSLP-14-0110)
- Gallena, S. J. K., Tian, W., Johnson, A. T., Vossoughi, J., Sarles, S. A., & Solomon, N. P. (2013). Validity of a new respiratory resistance measurement device to detect glottal area change. *Journal of Voice : Official Journal of the Voice Foundation*, 27(3), 299–304. <http://doi.org/10.1016/j.jvoice.2013.01.006>
- Gallena, S. K., Solomon, N. P., Johnson, A. T., Vossoughi, J., & Tian, W. (2014). Test-retest reliability of respiratory resistance measured with the airflow perturbation device. *Journal of Speech, Language, and Hearing Research : JSLHR*, 57(4), 1323–1329. [http://doi.org/10.1044/2014\\_JSLHR-S-13-0246](http://doi.org/10.1044/2014_JSLHR-S-13-0246)
- Gallivan, G. J., Hoffman, L., & Gallivan, K. H. (1996). Episodic paroxysmal laryngospasm: voice and pulmonary function assessment and management. *Journal of Voice*, 10(1), 93–105.
- Gartner-Schmidt, J. L., Shembel, A. C., Zullo, T. G., & Rosen, C. A. (2014). Development and validation of the Dyspnea Index (DI): a severity index for upper airway-related dyspnea. *Journal of Voice : Official Journal of the Voice Foundation*, 28(6), 775–782. <http://doi.org/10.1016/j.jvoice.2013.12.017>
- Geist, R., & Tallett, S. E. (1990). Diagnosis and management of psychogenic stridor caused by a conversion disorder. *Pediatrics*, 86(2), 315–317.
- George, M. K., O'Connell, J. E., & Batch, A. J. (1991). Paradoxical vocal cord motion: an unusual cause of stridor. *The Journal of Laryngology and Otology*, 105(4), 312–314. Retrieved from <http://eutils.ncbi.nlm.nih.gov/entrez/eutils/elink.fcgi?dbfrom=pubmed&id=2026951&retmode=ref&cmd=prlinks>
- Gessler, E. M., Simko, E. J., & Greinwald, J. H., Jr. (2002). Adult laryngomalacia: An uncommon clinical entity. *American Journal of Otolaryngology*, 23(6), 386–389. <http://doi.org/10.1053/ajot.2002.126322>
- Global Initiative for Asthma - Global Initiative for Asthma - GINA. (n.d.). Global Initiative for Asthma - Global Initiative for Asthma - GINA. Retrieved from [www.ginasthma.org](http://www.ginasthma.org)
- Goldstein, R., Bright, J., Jones, S. M., & Niven, R. M. (2007). Severe vocal cord dysfunction resistant to all current therapeutic interventions. *Respiratory Medicine*, 101(4), 857–858. <http://doi.org/10.1016/j.rmed.2006.08.009>
- Good, J. T., Jr, Kolakowski, C. A., Groshong, S. D., Murphy, J. R., & Martin, R. J. (2012). Refractory Asthma. *Chest*, 141(3), 599–606. <http://doi.org/10.1378/chest.11-0741>
- GOODMAN, D., OCONNELL, M., & SKIAREW, P. (1991). 554 Vocal cord dysfunction (VCD) presenting as anaphylaxis. *Journal of Allergy and Clinical Immunology*, 87(1), 278. [http://doi.org/10.1016/0091-6749\(91\)91837-J](http://doi.org/10.1016/0091-6749(91)91837-J)
- Guntupalli, K. K., Bandi, V., Sirgi, C., Pope, C., Rios, A., & Eschenbacher, W. (1997). Usefulness of flow volume loops in emergency center and ICU settings. *Chest*, 111(2), 481–488. Retrieved from <http://eutils.ncbi.nlm.nih.gov/entrez/eutils/elink.fcgi?dbfrom=pubmed&id=9042000&retmode=ref&cmd=prlinks>
- Gupta, D., Aggarwal, A. N., Panda, N. K., & Jindal, S. K. (2001). Vocal cord dysfunction presenting as recurrent acute severe asthma. *J Assoc Physicians India*, 49, 488–489.
- Guss, J., & Mirza, N. (2006). Methacholine challenge testing in the diagnosis of paradoxical vocal fold motion. *The Laryngoscope*, 116(9), 1558–1561. <http://doi.org/10.1097/01.mlg.0000228007.74561.33>
- Hamdan, A.-L., Moukarbel, R. V., & Youssef, M. (2006). Paradoxical vocal cord motion: an alarming stridor for a benign condition--case reports. *Middle East Journal of Anaesthesiology*, 18(6), 1191–1201. Retrieved from <http://eutils.ncbi.nlm.nih.gov/entrez/eutils/elink.fcgi?dbfrom=pubmed&id=17263275&retmode=ref&cmd=prlinks>
- Hammer, G., Schwinn, D., & Wollman, H. (1987). Postoperative complications due to paradoxical vocal cord motion. *Anesthesiology*, 66(5), 686–687.
- Hanks, C. D., Parsons, J., Benninger, C., Kaeding, C., Best, T. M., Phillips, G., & Mastrorarde, J. G. (2012). Etiology of dyspnea in elite and recreational athletes. *The Physician and Sportsmedicine*, 40(2), 28–33. <http://doi.org/10.3810/psm.2012.05.1962>

- Harbison, J., Dodd, J., & McNicholas, W. T. (2000). Paradoxical vocal cord motion causing stridor after thyroidectomy. *Thorax*, 55(6), 533–534. <http://doi.org/10.1136/thorax.55.6.533>
- Harmon, A., & Khursandi, D. C. S. (2007). Paradoxical vocal cord motion--a dangerous imitator of airway emergencies. *Anaesthesia and Intensive Care*, 35(1), 105–109.
- Heatley, D. G., & Swift, E. (1996). Paradoxical vocal cord dysfunction in an infant with stridor and gastroesophageal reflux. *International Journal of Pediatric Otorhinolaryngology*, 34(1-2), 149–151.
- Heffler, E., Bonini, M., Brussino, L., Solidoro, P., Guida, G., Boita, M., et al. (2016). Vitamin D deficiency and exercise-induced laryngospasm in young competitive rowers. *Applied Physiology, Nutrition, and Metabolism = Physiologie Appliquée, Nutrition Et Métabolisme*, 41(7), 735–740. <http://doi.org/10.1139/apnm-2015-0517>
- Heimdal, J.-H., Roksund, O. D., Halvorsen, T., Skadberg, B. T., & Olofsson, J. (2006). Continuous laryngoscopy exercise test: a method for visualizing laryngeal dysfunction during exercise. *The Laryngoscope*, 116(1), 52–57. <http://doi.org/10.1097/01.mlg.0000184528.16229.ba>
- Heinle, R., Linton, A., & Chidekel, A. S. (2004). Exercise-induced Vocal Cord Dysfunction Presenting as Asthma in Pediatric Patients: Toxicity of Inappropriate Inhaled Corticosteroids and the Role of Exercise Laryngoscopy. *Dx.Doi.org*, 16(4), 215–224. <http://doi.org/10.1089/088318703322751273>
- Heiser, J. M., Kahn, M. L., & Schmidt, T. A. (1990). Functional airway obstruction presenting as stridor: A case report and literature review. *The Journal of Emergency Medicine*, 8(3), 285–289. [http://doi.org/10.1016/0736-4679\(90\)90007-I](http://doi.org/10.1016/0736-4679(90)90007-I)
- Herin, F., Poussel, M., Renaudin, J.-M., Leininger, A., Moreau-Colson, C., Menard, O., & Paris, C. (2012). A 38-year-old hairdresser with irritant-associated vocal cord dysfunction [Case study]. *The International Journal of Tuberculosis and Lung Disease : the Official Journal of the International Union Against Tuberculosis and Lung Disease*, 16(1), 138–139. <http://doi.org/10.5588/ijtld.11.0315>
- Hira, H. S., & Singh, A. (2009). Significance of upper airway influence among patients of vocal cord dysfunction for its diagnosis: Role of impulse oscillometry. *Lung India : Official Organ of Indian Chest Society*, 26(1), 5–8. <http://doi.org/10.4103/0970-2113.45197>
- Huggins, J. T., Kaplan, A., Martin-Harris, B., & Sahn, S. A. (2004). Eucalyptus as a specific irritant causing vocal cord dysfunction. *Annals of Allergy, Asthma & Immunology*, 93(3), 299–303. [http://doi.org/10.1016/S1081-1206\(10\)61505-0](http://doi.org/10.1016/S1081-1206(10)61505-0)
- Husein, O. F., Husein, T. N., Gardner, R., Chiang, T., Larson, D. G., Obert, K., et al. (2008). Formal Psychological Testing in Patients With Paradoxical Vocal Fold Dysfunction. *The Laryngoscope*, 118(4), 740–747. <http://doi.org/10.1097/MLG.0b013e31815ed13a>
- Jain, S., Bandi, V., Officer, T., Wolley, M., & Guntupalli, K. K. (2006). Role of vocal cord function and dysfunction in patients presenting with symptoms of acute asthma exacerbation. *Journal of Asthma*, 43(3), 207–212. <http://doi.org/10.1080/02770900600566892>
- James, C. A., Leacock-Chau, N., & Palazzo, R. M. (2000). All that wheezes.... *Current Opinion in Pediatrics*, 12(3), 213–216.
- Johansson, H., Norlander, K., Berglund, L., Janson, C., Malinovschi, A., Nordvall, L., et al. (2014). Prevalence of exercise-induced bronchoconstriction and exercise-induced laryngeal obstruction in a general adolescent population. *Thorax*, 70(1), 57–63. <http://doi.org/10.1136/thoraxjnl-2014-205738>
- Juliá, J. C., Martorell, A., Armengot, M. A., Lluch, R., Boluda, C. F., Cerdá, J. C., & Alvarez, V. (1999). Vocal cord dysfunction in a child. *Allergy*, 54(7), 748–751.
- Kaslovsky, R., & Gottsegen, D. (2015). Hypnosis for Asthma and Vocal Cord Dysfunction in a Patient With Autism. *American Journal of Clinical Hypnosis*, 58(2), 195–203. <http://doi.org/10.1080/00029157.2014.989566>
- Kattan, M., & Ben-Zvi, Z. (1985). Stridor caused by vocal cord malfunction associated with emotional factors. *Clinical Pediatrics*, 24(3), 158–160. Retrieved from <http://eutils.ncbi.nlm.nih.gov/entrez/eutils/elink.fcgi?dbfrom=pubmed&id=3971643&retmode=ref&cmd=prlinks>

- Kayani, S., & Shannon, D. C. (1998). Vocal cord dysfunction associated with exercise in adolescent girls. *Chest*, 113(2), 540–542. <http://doi.org/10.1378/chest.113.2.540>
- Kellman, R. M., & Leopold, D. A. (1982). Paradoxical vocal cord motion: an important cause of stridor. *The Laryngoscope*, 92(1), 58–60. Retrieved from <http://eutils.ncbi.nlm.nih.gov/entrez/eutils/elink.fcgi?dbfrom=pubmed&id=7162297&retmode=ref&cmd=prlinks>
- Khemani, R. G., Schneider, J. B., Morzov, R., Markovitz, B., & Newth, C. J. L. (2013). Pediatric upper airway obstruction: interobserver variability is the road to perdition. *Journal of Critical Care*, 28(4), 490–497. <http://doi.org/10.1016/j.jcrc.2012.11.009>
- Kivity, S., Bibi, H., Schwarz, Y., Greif, Y., Topilsky, M., & Tabachnick, E. (1986). Variable Vocal Cord Dysfunction Presenting as Wheezing and Exercise-Induced Asthma. *Journal of Asthma*, 23(5), 241–244. <http://doi.org/10.3109/02770908609073167>
- Koester, M. C., & Amundson, C. L. (2002). Seeing the Forest Through the Wheeze: A Case-Study Approach to Diagnosing Paradoxical Vocal-Cord Dysfunction. *J Athl Train*, 37(3), 320–324. Retrieved from <http://eutils.ncbi.nlm.nih.gov/entrez/eutils/elink.fcgi?dbfrom=pubmed&id=12937589&retmode=ref&cmd=prlinks>
- Komarow, H. D., Young, M., Nelson, C., & Metcalfe, D. D. (2013). Vocal cord dysfunction as demonstrated by impulse oscillometry. *The Journal of Allergy and Clinical Immunology. in Practice*, 1(4), 387–393. <http://doi.org/10.1016/j.jaip.2013.05.005>
- Kuppersmith, R., Rosen, D. S., & Wiatrak, B. J. (1993). Functional stridor in adolescents. *The Journal of Adolescent Health : Official Publication of the Society for Adolescent Medicine*, 14(3), 166–171. Retrieved from <http://eutils.ncbi.nlm.nih.gov/entrez/eutils/elink.fcgi?dbfrom=pubmed&id=8323927&retmode=ref&cmd=prlinks>
- la Hoz, de, R. E., Shohet, M. R., Bienenfeld, L. A., Afilaka, A. A., Levin, S. M., & Herbert, R. (2008). Vocal cord dysfunction in former World Trade Center (WTC) rescue and recovery workers and volunteers. *American Journal of Industrial Medicine*, 51(3), 161–165. <http://doi.org/10.1002/ajim.20541>
- Lacy, T. J., & McManis, S. E. (1994). Psychogenic stridor. *General Hospital Psychiatry*, 16(3), 213–223.
- Lakin, R. C., Metzger, W. J., & Haughey, B. H. (1984). Upper airway obstruction presenting as exercise-induced asthma. *Chest*, 86(3), 499–501. Retrieved from <http://eutils.ncbi.nlm.nih.gov/entrez/eutils/elink.fcgi?dbfrom=pubmed&id=6468016&retmode=ref&cmd=prlinks>
- Landwehr, L. P., Wood, R. P., Blager, F. B., & Milgrom, H. (1996). Vocal cord dysfunction mimicking exercise-induced bronchospasm in adolescents. *Pediatrics*, 98(5), 971–974. Retrieved from <http://eutils.ncbi.nlm.nih.gov/entrez/eutils/elink.fcgi?dbfrom=pubmed&id=8909498&retmode=ref&cmd=prlinks>
- Larsen, B., Caruso, L. J., & Villariet, D. B. (2004). Paradoxical vocal cord motion: an often misdiagnosed cause of postoperative stridor. *Journal of Clinical Anesthesia*, 16(3), 230–234. <http://doi.org/10.1016/j.jclinane.2003.08.010>
- Leo, R. J., & Konakanchi, R. (1999). Psychogenic Respiratory Distress: A Case of Paradoxical Vocal Cord Dysfunction and Literature Review. *Primary Care Companion to the Journal of Clinical Psychiatry*, 1(2), 39–46.
- Liistro, G., Stănescu, D., Dejonckere, P., Rodenstein, D., & Veriter, C. (1990). Exercise-induced laryngospasm of emotional origin. *Pediatric Pulmonology*, 8(1), 58–60. Retrieved from <http://eutils.ncbi.nlm.nih.gov/entrez/eutils/elink.fcgi?dbfrom=pubmed&id=2300407&retmode=ref&cmd=prlinks>
- Lim, T. K. (1991). Vocal cord dysfunction presenting as bronchial asthma: the association with abnormal thoraco-abdominal wall motion. *Singapore Med J*, 32(4), 208–210. Retrieved from <http://eutils.ncbi.nlm.nih.gov/entrez/eutils/elink.fcgi?dbfrom=pubmed&id=1837949&retmode=ref&cmd=prlinks>
- Lo, H.-I., Ho, H.-C., & Hwang, J.-H. (2005). Paradoxical vocal cord motion--a case report. *Auris, Nasus, Larynx*, 32(4), 427–430. <http://doi.org/10.1016/j.anl.2005.05.012>
- Logvinoff, M. M., Lau, K. Y., Weinstein, D. B., & Chandra, P. (1990). Episodic stridor in a child secondary to vocal cord dysfunction. *Pediatric Pulmonology*, 9(1), 46–48. Retrieved from <http://eutils.ncbi.nlm.nih.gov/entrez/eutils/elink.fcgi?dbfrom=pubmed&id=2388780&retmode=ref&cmd=prlinks>
- Low, K., Lau, K. K., Holmes, P., Crossett, M., Vallance, N., Phyland, D., et al. (2011). Abnormal vocal cord function in difficult-to-treat asthma. *American Journal of Respiratory and Critical Care Medicine*, 184(1), 50–56. <http://doi.org/10.1164/rccm.201010-1604OC>



- Lund, D. S., Garmel, G. M., Kaplan, G. S., & Tom, P. A. (1993). Hysterical stridor: a diagnosis of exclusion. *The American Journal of Emergency Medicine*, 11(4), 400–402.
- Maat, R. C., Hilland, M., Roksund, O. D., Halvorsen, T., Olofsson, J., Aarstad, H. J., & Heimdal, J.-H. (2011). Exercise-induced laryngeal obstruction: natural history and effect of surgical treatment. *European Archives of Oto-Rhino-Laryngology : Official Journal of the European Federation of Oto-Rhino-Laryngological Societies (EUFOS) : Affiliated with the German Society for Oto-Rhino-Laryngology - Head and Neck Surgery*, 268(10), 1485–1492. <http://doi.org/10.1007/s00405-011-1656-1>
- Maat, R. C., Roksund, O. D., Halvorsen, T., Skadberg, B. T., Olofsson, J., Ellingsen, T. A., et al. (2009). Audiovisual assessment of exercise-induced laryngeal obstruction: reliability and validity of observations. *European Archives of Oto-Rhino-Laryngology : Official Journal of the European Federation of Oto-Rhino-Laryngological Societies (EUFOS) : Affiliated with the German Society for Oto-Rhino-Laryngology - Head and Neck Surgery*, 266(12), 1929–1936. <http://doi.org/10.1007/s00405-009-1030-8>
- Maat, R. C., Roksund, O. D., Olofsson, J., Halvorsen, T., Skadberg, B. T., & Heimdal, J.-H. (2007). Surgical treatment of exercise-induced laryngeal dysfunction. *European Archives of Oto-Rhino-Laryngology : Official Journal of the European Federation of Oto-Rhino-Laryngological Societies (EUFOS) : Affiliated with the German Society for Oto-Rhino-Laryngology - Head and Neck Surgery*, 264(4), 401–407. <http://doi.org/10.1007/s00405-006-0216-6>
- Mahut, B., Fuchs-Climent, D., Plantier, L., Karila, C., Refabert, L., Chevalier-Bidaud, B., et al. (2014). Cross-sectional assessment of exertional dyspnea in otherwise healthy children. *Pediatric Pulmonology*, 49(8), 772–781. <http://doi.org/10.1002/ppul.22905>
- Marcinow, A. M., Thompson, J., Chiang, T., Forrest, L. A., & deSilva, B. W. (2014). Paradoxical vocal fold motion disorder in the elite athlete: experience at a large division I university. *The Laryngoscope*, 124(6), 1425–1430. <http://doi.org/10.1002/lary.24486>
- Marcinow, A. M., Thompson, J., Forrest, L. A., & deSilva, B. W. (2015). Irritant-Induced Paradoxical Vocal Fold Motion Disorder: Diagnosis and Management. *Otolaryngology--Head and Neck Surgery : Official Journal of American Academy of Otolaryngology-Head and Neck Surgery*, 153(6), 996–1000. <http://doi.org/10.1177/0194599815600144>
- Maricle, R. (1983). Vocal-cord dysfunction presenting as asthma. *The New England Journal of Medicine*, 309(19), 1190–1191. <http://doi.org/10.1056/NEJM198311103091915>
- Marsh, C. B., Trudeau, M. D., & Weiland, J. E. (1994). Recurrent asthma despite corticosteroid therapy in a 35-year-old woman. *Chest*, 105(6), 1855–1857. Retrieved from <http://eutils.ncbi.nlm.nih.gov/entrez/eutils/elink.fcgi?dbfrom=pubmed&id=8205888&retmode=ref&cmd=prlinks>
- Maschka, D. A., Bauman, N. M., McCray, P. B., Hoffman, H. T., Karnell, M. P., & Smith, R. J. H. (1997). A Classification Scheme for Paradoxical Vocal Cord Motion. *The Laryngoscope*, 107(11), 1429–1435. <http://doi.org/10.1097/00005537-199711000-00002>
- Mathers-Schmidt, B. A., & Brilla, L. R. (2005). Inspiratory muscle training in exercise-induced paradoxical vocal fold motion. *Journal of Voice*, 19(4), 635–644. <http://doi.org/10.1016/j.jvoice.2005.03.005>
- McClellan, S. P., Lee, J. L., Sim, T. C., Naranjo, M., & Grant, J. A. (1989). Intermittent breathlessness. *Ann Allergy*, 63(6 Pt 1), 486–488. Retrieved from <http://eutils.ncbi.nlm.nih.gov/entrez/eutils/elink.fcgi?dbfrom=pubmed&id=2596756&retmode=ref&cmd=prlinks>
- McFadden, E. R., & Zawadski, D. K. (1996). Vocal cord dysfunction masquerading as exercise-induced asthma. a physiologic cause for “choking” during athletic activities. *American Journal of Respiratory and Critical Care Medicine*, 153(3), 942–947. <http://doi.org/10.1164/ajrccm.153.3.8630577>
- McNally, P., & Grealley, P. (2010). Use of post-exercise laryngoscopy to evaluate exercise induced dyspnea. *Pediatric Pulmonology*, 45(10), 1037–1039. <http://doi.org/10.1002/ppul.21280>
- McQuaid, E. L., Spieth, L. E., & Spirito, A. (1997). The pediatric psychologist's role in differential diagnosis: vocal-cord dysfunction presenting as asthma. *Journal of Pediatric Psychology*, 22(5), 739–748.
- Mehlum, C. S., Walsted, E. S., Godballe, C., & Backer, V. (2016). Supraglottoplasty as treatment of exercise induced laryngeal obstruction (EILO). *European Archives of Oto-Rhino-Laryngology : Official Journal of the European*

- Federation of Oto-Rhino-Laryngological Societies (EUFOS) : Affiliated with the German Society for Oto-Rhino-Laryngology - Head and Neck Surgery, 273(4), 945–951. <http://doi.org/10.1007/s00405-015-3823-2>
- Michelsen, L. G., & VANDERSPEK, A. F. L. (1988). An unexpected functional cause of upper airway obstruction. *Anaesthesia*, 43(12), 1028–1030. <http://doi.org/10.1111/j.1365-2044.1988.tb05702.x>
- Mirasola, K. L., Braun, N., Blumin, J. H., Kerschner, J. E., & Merati, A. L. (2008). Self-reported voice-related quality of life in adolescents with paradoxical vocal fold dysfunction. *Journal of Voice*, 22(3), 373–378. <http://doi.org/10.1016/j.jvoice.2006.11.003>
- Mobeireek, A., Alhamad, A., Al-Subaei, A., & Alzeer, A. (1995). Psychogenic vocal cord dysfunction simulating bronchial asthma. *European Respiratory Journal*, 8(11), 1978–1981. Retrieved from <http://eutils.ncbi.nlm.nih.gov/entrez/eutils/efetch.fcgi?dbfrom=pubmed&id=8620973&retmode=ref&cmd=prlinks>
- Montejo, J., Gonzalez, R., Hernandez, E., Zafra, M., & Plaza, G. (2015). Office-based laryngeal injection of botulinum toxin for paradoxical vocal fold motion in a child. *International Journal of Pediatric Otorhinolaryngology*, 79(7), 1161–1163. <http://doi.org/10.1016/j.ijporl.2015.04.044>
- Morris, M. J., Deal, L. E., Bean, D. R., Grbach, V. X., & Morgan, J. A. (1999). Vocal Cord Dysfunction in Patients With Exertional Dyspnea. *Chest*, 116(6), 1676–1682. <http://doi.org/10.1378/chest.116.6.1676>
- Morrison, M., Rammage, L., & Emami, A. J. (1999). The irritable larynx syndrome. *Journal of Voice*, 13(3), 447–455. [http://doi.org/10.1016/s0892-1997\(99\)80049-6](http://doi.org/10.1016/s0892-1997(99)80049-6)
- Mullinax, M. C., & Kuhn, W. F. (1996). Benign paradoxical vocal cord adduction presenting as acute stridor. *European Journal of Emergency Medicine : Official Journal of the European Society for Emergency Medicine*, 3(2), 102–105.
- Muñoz, X., Roger, A., la Rosa, De, D., Morell, F., & Cruz, M. J. (2007). Occupational vocal cord dysfunction due to exposure to wood dust and xerographic toner. *Scandinavian Journal of Work, Environment & Health*, 33(2), 153–158. Retrieved from <http://eutils.ncbi.nlm.nih.gov/entrez/eutils/efetch.fcgi?dbfrom=pubmed&id=17460804&retmode=ref&cmd=prlinks>
- Myers, D. W., Martin, R. J., Eckert, R. C., & Sweeney, M. K. (1985). Functional versus organic vocal cord paralysis: Rapid diagnosis and decannulation. *The Laryngoscope*, 95(10), 1235–1237. <http://doi.org/10.1288/00005537-198510000-00017>
- Nacci, A., Fattori, B., Ursino, F., Rocchi, V., Matteucci, F., Citi, C., et al. (2007). Paradoxical vocal cord dysfunction: clinical experience and personal considerations. *Acta Otorhinolaryngologica Italica : Organo Ufficiale Della Societa Italiana Di Otorinolaringologia E Chirurgia Cervico-Facciale*, 27(5), 248–254. Retrieved from </pmc/articles/PMC2640031/?report=abstract>
- Nagai, A., Matsumiya, H., Hayashi, M., Kanemura, T., Yasui, S., & Konno, K. (1993). Lesions of the arytenoid region in a patient with exertional dyspnoea. *European Respiratory Journal*, 6(7), 1065–1066.
- Nielsen, E. W., Hull, J. H., & Backer, V. (2013). High prevalence of exercise-induced laryngeal obstruction in athletes. *Medicine and Science in Sports and Exercise*, 45(11), 2030–2035. <http://doi.org/10.1249/MSS.0b013e318298b19a>
- Niven, R. M., Roberts, T., Pickering, C. A., & Webb, A. K. (1992). Functional upper airways obstruction presenting as asthma. *Respiratory Medicine*, 86(6), 513–516. Retrieved from <http://eutils.ncbi.nlm.nih.gov/entrez/eutils/efetch.fcgi?dbfrom=pubmed&id=1470710&retmode=ref&cmd=prlinks>
- Norlander, K., Christensen, P. M., Maat, R. C., Halvorsen, T., Heimdal, J.-H., Morén, S., et al. (2016). Comparison between two assessment methods for exercise-induced laryngeal obstructions. *European Archives of Oto-Rhino-Laryngology : Official Journal of the European Federation of Oto-Rhino-Laryngological Societies (EUFOS) : Affiliated with the German Society for Oto-Rhino-Laryngology - Head and Neck Surgery*, 273(2), 425–430. <http://doi.org/10.1007/s00405-015-3758-7>
- Norlander, K., Johansson, H., Jansson, C., Nordvall, L., & Nordang, L. (2015). Surgical treatment is effective in severe cases of exercise-induced laryngeal obstruction: A follow-up study. *Acta Oto-Laryngologica*, 135(11), 1152–1159. <http://doi.org/10.3109/00016489.2015.1062548>
- Norman, P. S., & Peters, S. P. (1983). “Asthma” that cleared when patient coughed. *Hospital Practice (Office Ed.)*, 18(11), 51–57. Retrieved from <http://eutils.ncbi.nlm.nih.gov/entrez/eutils/efetch.fcgi?dbfrom=pubmed&id=6414940&retmode=ref&cmd=prlinks>

- Nugent, J. S., Nugent, A. L., Whisman, B. A., White, K., & Hagan, L. L. (2003). Levothyroxine anaphylaxis? Vocal cord dysfunction mimicking an anaphylactic drug reaction. *Annals of Allergy, Asthma & Immunology*, 91(4), 337–341. [http://doi.org/10.1016/S1081-1206\(10\)61679-1](http://doi.org/10.1016/S1081-1206(10)61679-1)
- Nussbaum, E., & Maggi, J. C. (1990). Laryngomalacia in children. *Chest*, 98(4), 942–944.
- Olin, J. T., Clary, M. S., Fan, E. M., Johnston, K. L., State, C. M., Strand, M., & Christopher, K. L. (2016). Continuous laryngoscopy quantitates laryngeal behaviour in exercise and recovery. *The European Respiratory Journal*, ERJ-00160–2016. <http://doi.org/10.1183/13993003.00160-2016>
- Omland, T., & Brøndbo, K. (2008). Paradoxical vocal cord movement in newborn and congenital idiopathic vocal cord paralysis: two of a kind? *European Archives of Oto-Rhino-Laryngology : Official Journal of the European Federation of Oto-Rhino-Laryngological Societies (EUFOS) : Affiliated with the German Society for Oto-Rhino-Laryngology - Head and Neck Surgery*, 265(7), 803–807. <http://doi.org/10.1007/s00405-008-0668-y>
- Patel, N. J., Jorgensen, C., Kuhn, J., & Merati, A. L. (2004). Concurrent laryngeal abnormalities in patients with paradoxical vocal fold dysfunction. *Otolaryngology - Head and Neck Surgery*, 130(6), 686–689. <http://doi.org/10.1016/j.otohns.2004.01.003>
- Perkner, J. J., Fennelly, K. P., Balkissoon, R., Bartelson, B. B., Rutenber, A. J., Wood, R. P., & Newman, L. S. (1998). Irritant-associated vocal cord dysfunction. *Journal of Occupational and Environmental Medicine*, 40(2), 136–143.
- Phua, S. Y., McGarvey, L. P. A., Ngu, M. C., & Ing, A. J. (2005). Patients with gastro-oesophageal reflux disease and cough have impaired laryngopharyngeal mechanosensitivity. *Thorax*, 60(6), 488–491. <http://doi.org/10.1136/thx.2004.033894>
- Phua, S.-Y., McGarvey, L., Ngu, M., & Ing, A. (2010). The differential effect of gastroesophageal reflux disease on mechanostimulation and chemostimulation of the laryngopharynx. *Chest*, 138(5), 1180–1185. <http://doi.org/10.1378/chest.09-2387>
- Pinho, S. M., Tsuji, D. H., Sennes, L., & Menezes, M. (1997). Paradoxical vocal fold movement: a case report. *Journal of Voice*, 11(3), 368–372.
- Poirier, M. P., Pancioli, A. M., & DiGiulio, G. A. (1996). Vocal cord dysfunction presenting as acute asthma in a pediatric patient. *Pediatric Emergency Care*, 12(3), 213–214. Retrieved from <http://eutils.ncbi.nlm.nih.gov/entrez/eutils/elink.fcgi?dbfrom=pubmed&id=8806149&retmode=ref&cmd=prlinks>
- Powell, S. A., Nguyen, C. T., Gaziano, J., Lewis, V., Lockey, R. F., & Padhya, T. A. (2007). Mass Psychogenic Illness Presenting as Acute Stridor in an Adolescent Female Cohort. *The Annals of Otolaryngology, Rhinology, and Laryngology*, 116(7), 525–531. <http://doi.org/10.1177/000348940711600708>
- Rameau, A., Foltz, R. S., Wagner, K., & Zur, K. B. (2012). Multidisciplinary approach to vocal cord dysfunction diagnosis and treatment in one session: a single institutional outcome study. *International Journal of Pediatric Otorhinolaryngology*, 76(1), 31–35. <http://doi.org/10.1016/j.ijporl.2011.09.017>
- Ramírez, J., León, I., & Rivera, L. M. (1986). Episodic laryngeal dyskinesia. Clinical and psychiatric characterization. *Chest*, 90(5), 716–721. Retrieved from <http://eutils.ncbi.nlm.nih.gov/entrez/eutils/elink.fcgi?dbfrom=pubmed&id=3769575&retmode=ref&cmd=prlinks>
- Reisner, C., & Nelson, H. S. (1997). Vocal cord dysfunction with nocturnal awakening. *The Journal of Allergy and Clinical Immunology*, 99(6 Pt 1), 843–846. Retrieved from <http://eutils.ncbi.nlm.nih.gov/entrez/eutils/elink.fcgi?dbfrom=pubmed&id=9215254&retmode=ref&cmd=prlinks>
- Renz, V., Hern, J., Tostevin, P., Hung, T., & Wyatt, M. (2000). Functional laryngeal dyskinesia: an important cause of stridor. *The Journal of Laryngology and Otolaryngology*, 114(10), 790–792. Retrieved from <http://eutils.ncbi.nlm.nih.gov/entrez/eutils/elink.fcgi?dbfrom=pubmed&id=11127154&retmode=ref&cmd=prlinks>
- Richter, G. T., Rutter, M. J., deAlarcon, A., Orvidas, L. J., & Thompson, D. M. (2008). Late-onset laryngomalacia: a variant of disease. *Archives of Otolaryngology - Head and Neck Surgery*, 134(1), 75–80. <http://doi.org/10.1001/archoto.2007.17>
- Roberts, K. W., Crnkovic, A., & Steiniger, J. R. (1998). Post-anesthesia paradoxical vocal cord motion successfully treated with midazolam. *Anesthesiology*, 89(2), 517–519.

- Rodenstein, D. O., Francis, C., & Stănescu, D. C. (1983). Emotional laryngeal wheezing: a new syndrome. *Am Rev Respir Dis*, 127(3), 354–356. <http://doi.org/10.1164/arrd.1983.127.3.354>
- Rogers, J. H., & Stell, P. M. (1978). Paradoxical movement of the vocal cords as a cause of stridor. *The Journal of Laryngology and Otology*, 92(2), 157–158.
- Roksund, O. D., Maat, R. C., Heimdal, J.-H., Olofsson, J., Skadberg, B. T., & Halvorsen, T. (2009). Exercise induced dyspnea in the young. Larynx as the bottleneck of the airways. *Respiratory Medicine*, 103(12), 1911–1918. <http://doi.org/10.1016/j.rmed.2009.05.024>
- Rusakow, L. S., Blager, F. B., Barkin, R. C., & White, C. W. (1991). Acute respiratory distress due to vocal cord dysfunction in cystic fibrosis. *Journal of Asthma*, 28(6), 443–446. Retrieved from <http://eutils.ncbi.nlm.nih.gov/entrez/eutils/elink.fcgi?dbfrom=pubmed&id=1744030&retmode=ref&cmd=prlinks>
- Ruske, D., & Stevenson, S. (2001). Paradoxical vocal fold dysfunction: a frequently mis(sed) diagnosis. *The New Zealand Medical Journal*, 114(1138), 380–381. Retrieved from <http://eutils.ncbi.nlm.nih.gov/entrez/eutils/elink.fcgi?dbfrom=pubmed&id=11589436&retmode=ref&cmd=prlinks>
- Ryan, N. M., & Gibson, P. G. (2009). Characterization of laryngeal dysfunction in chronic persistent cough. *The Laryngoscope*, 119(4), 640–645. <http://doi.org/10.1002/lary.20114>
- Saadoon, A. A., & Ehlayel, M. (2012). Co-existing paradoxical vocal cord motion and asthma in a young child. *Pediatric Pulmonology*, 47(1), 96–98. <http://doi.org/10.1002/ppul.21514>
- Sakthivel, P., Ranipatel, S., Singh, I., & Gulati, A. (2015). Paradoxical vocal cord movement during sleep - A unique case with review of literature. *International Journal of Pediatric Otorhinolaryngology*, 79(11), 1946–1948. <http://doi.org/10.1016/j.ijporl.2015.08.019>
- Seifert, E., & Kollbrunner, J. (2007). Vocal cord dysfunction: dealing with aggressivity. *Swiss Medical Weekly*, 137(7-8), 127–129. Retrieved from <http://eutils.ncbi.nlm.nih.gov/entrez/eutils/elink.fcgi?dbfrom=pubmed&id=17370151&retmode=ref&cmd=prlinks>
- Selner, J. C., Staudenmayer, H., Koepke, J. W., Harvey, R., & Christopher, K. (1987). Vocal cord dysfunction: the importance of psychologic factors and provocation challenge testing. *The Journal of Allergy and Clinical Immunology*, 79(5), 726–733. Retrieved from <http://eutils.ncbi.nlm.nih.gov/entrez/eutils/elink.fcgi?dbfrom=pubmed&id=3571766&retmode=ref&cmd=prlinks>
- Shao, W., Chung, T., Berdon, W. E., Mellins, R. B., Griscom, N. T., Ruzal-Shapiro, C., & Schneider, P. (1995). Fluoroscopic diagnosis of laryngeal asthma (paradoxical vocal cord motion). *AJR. American Journal of Roentgenology*, 165(5), 1229–1231. <http://doi.org/10.2214/ajr.165.5.7572509>
- Sidell, D. R., Balakrishnan, K., Hart, C. K., Willging, J. P., Knecht, S. K., & de Alarcon, A. (2014). Pediatric Exercise Stress Laryngoscopy following Laryngotracheoplasty: A Comparative Review. *Otolaryngology--Head and Neck Surgery : Official Journal of American Academy of Otolaryngology-Head and Neck Surgery*, 150(6), 1056–1061. <http://doi.org/10.1177/0194599814528097>
- Sim, T. C., McClean, S. P., Lee, J. L., & Naranjo, M. S. (1990). Functional laryngeal obstruction: A somatization disorder. *The American journal of ...*
- Skinner, D. W., & Bradley, P. J. (1989). Psychogenic stridor. *The Journal of Laryngology and Otology*, 103(4), 383–385. Retrieved from <http://eutils.ncbi.nlm.nih.gov/entrez/eutils/elink.fcgi?dbfrom=pubmed&id=2654307&retmode=ref&cmd=prlinks>
- Smith, M. E., Darby, K. P., & Kirchner, K. (1993). Simultaneous functional laryngeal stridor and functional aphonia in an adolescent. *American journal of ...*
- Smith, R. J. H., Kramer, M., Bauman, N. M., Smits, W. L., Bent, J. P., & Ahrens, R. C. (1995). Exercise-Induced Laryngomalacia. *The Annals of Otolology, Rhinology, and Laryngology*, 104(7), 537–541. <http://doi.org/10.1177/000348949510400707>
- Snyder, H. S., & Weiss, E. (1989). Hysterical stridor: A benign cause of upper airway obstruction. *Annals of Emergency Medicine*, 18(9), 991–994. [http://doi.org/10.1016/S0196-0644\(89\)80467-6](http://doi.org/10.1016/S0196-0644(89)80467-6)
- Sokol, W. (1993). Vocal cord dysfunction presenting as asthma. *The Western Journal of Medicine*, 158(6), 614–615.

- Soli, C. G., & Smally, A. J. (2005). Vocal cord dysfunction: an uncommon cause of stridor. *The Journal of Emergency Medicine*, 28(1), 31–33. <http://doi.org/10.1016/j.jemermed.2004.10.001>
- Starkman, M. N., & Appelblatt, N. H. (1984). Functional upper airway obstruction: a possible somatization disorder. *Psychosomatics*, 25(4), 327–9–332–3. Retrieved from <http://eutils.ncbi.nlm.nih.gov/entrez/eutils/elink.fcgi?dbfrom=pubmed&id=6718666&retmode=ref&cmd=prlinks>
- Staudenmayer, H., Christopher, K. L., Repsher, L., & Hill, R. H. (2011). Mass Psychogenic Illness: Psychological Predisposition and Iatrogenic Pseudo-vocal Cord Dysfunction and Pseudo-reactive Airways Disease Syndrome. *Journal of Medical Toxicology*, 7(2), 109–117. <http://doi.org/10.1007/s13181-011-0136-8>
- Steckelberg, R. C., Tsiang, D., Pettijohn, K., Mendelsohn, A., & Hoftman, N. (2015). Acute vocal fold dystonic reaction to propofol: a case report. *American Journal of Otolaryngology*, 36(2), 303–305. <http://doi.org/10.1016/j.amjoto.2014.11.006>
- Sukhani, R., Barclay, J., & Chow, J. (1993). Paradoxical vocal cord motion: an unusual cause of stridor in the recovery room. *Anesthesiology*, 79(1), 177–180.
- Suri, J. C., Sen, M. K., Chakrabarti, S., & Mehta, C. (2002). Vocal cord dysfunction presenting as refractory asthma. *The Indian Journal of Chest Diseases & Allied Sciences*, 44(1), 49–52. <http://doi.org/10.1056/NEJM198311103091915>
- Suttithawil, W., Chakkaphak, S., Jaruchinda, P., & Fuangtong, R. (2006). Vocal cord dysfunction concurrent with a nutcracker esophagus and the role of gastroesophageal reflux disease. *Annals of Allergy, Asthma & Immunology*, 96(2), 373–375. [http://doi.org/10.1016/S1081-1206\(10\)61251-3](http://doi.org/10.1016/S1081-1206(10)61251-3)
- Tan, K. L., Eng, P., & Ong, Y. Y. (1997). Vocal cord dysfunction: two case reports. *Annals of the Academy of Medicine, Singapore*, 26(4), 494–496. Retrieved from <http://eutils.ncbi.nlm.nih.gov/entrez/eutils/elink.fcgi?dbfrom=pubmed&id=9395817&retmode=ref&cmd=prlinks>
- Tamarcaz, P., Grissell, T. V., Borgas, T., & Gibson, P. G. (2004). Transient postviral vocal cord dysfunction. *The Journal of Allergy and Clinical Immunology*, 114(6), 1471–1472. <http://doi.org/10.1016/j.jaci.2004.08.038>
- Tay, T. R., Radhakrishna, N., Hore-Lacy, F., Smith, C., Hoy, R., Dabscheck, E., & Hew, M. (2016). Comorbidities in difficult asthma are independent risk factors for frequent exacerbations, poor control and diminished quality of life. *Respirology (Carlton, Vic.)*. <http://doi.org/10.1111/resp.12838>
- Tervonen, H., Niskanen, M. M., Sovijärvi, A. R., Hakulinen, A. S., Vilkmann, E. A., & Aaltonen, L.-M. M. (2009). Fiberoptic videolaryngoscopy during bicycle ergometry: a diagnostic tool for exercise-induced vocal cord dysfunction. *The Laryngoscope*, 119(9), 1776–1780. <http://doi.org/10.1002/lary.20558>
- Tilles, S. A., Ayars, A. G., Picciano, J. F., & Altman, K. (2013). Exercise-induced vocal cord dysfunction and exercise-induced laryngomalacia in children and adolescents: the same clinical syndrome? *Annals of Allergy, Asthma & Immunology : Official Publication of the American College of Allergy, Asthma, & Immunology*, 111(5), 342–346.e1. <http://doi.org/10.1016/j.anaai.2013.07.025>
- Tomares, S. M., Flotte, T. R., Tunkel, D. E., Pao, M., & Loughlin, G. M. (1993). Real time laryngoscopy with olfactory challenge for diagnosis of psychogenic stridor. *Pediatric Pulmonology*, 16(4), 259–262.
- Tonini, S., Dellabianca, A., Costa, C., Lanfranco, A., Scafa, F., & Candura, S. M. (2009). Irritant vocal cord dysfunction and occupational bronchial asthma: differential diagnosis in a health care worker. *International Journal of Occupational Medicine and Environmental Health*, 22(4), 401–406. <http://doi.org/10.2478/v10001-009-0038-z>
- Tousignant, G., & Kleiman, S. J. (1992). Functional stridor diagnosed by the anaesthetist. *Canadian Journal of Anaesthesia = Journal Canadien D'anesthésie*, 39(3), 286–289. <http://doi.org/10.1007/BF03008791>
- Traister, R. S., Fajt, M. L., & Petrov, A. A. (2016). The morbidity and cost of vocal cord dysfunction misdiagnosed as asthma. *Allergy and Asthma Proceedings : the Official Journal of Regional and State Allergy Societies*, 37(2), 25–31. <http://doi.org/10.2500/aap.2016.37.3936>
- Traister, R. S., Fajt, M. L., Landsittel, D., & Petrov, A. A. (2014). A novel scoring system to distinguish vocal cord dysfunction from asthma. *The Journal of Allergy and Clinical Immunology. in Practice*, 2(1), 65–69. <http://doi.org/10.1016/j.jaip.2013.09.002>

- Turmel, J., Gagnon, S., Bernier, M., & Boulet, L.-P. (2015). Eucapnic voluntary hyperpnoea and exercise-induced vocal cord dysfunction: Table 1. *BMJ Open Sport & Exercise Medicine*, 1(1), e000065. <http://doi.org/10.1136/bmjsem-2015-000065>
- van Griethuysen, J., Yaghchi, A., C., & Sandhu, G. (2012). Use of bilateral suture lateralisation technique in severe paradoxical vocal fold movement, allowing removal of long-term tracheostomy: case report. *The Journal of Laryngology and Otology*, 126(3), 328–330. <http://doi.org/10.1017/S0022215111003318>
- Vertigan, A. E., Bone, S. L., & Gibson, P. G. (2013). Laryngeal sensory dysfunction in laryngeal hypersensitivity syndrome. *Respirology (Carlton, Vic.)*, 18(6), 948–956. <http://doi.org/10.1111/resp.12103>
- Vertigan, A. E., Bone, S. L., & Gibson, P. G. (2014). Development and validation of the Newcastle laryngeal hypersensitivity questionnaire. *Cough*, 10(1), 1. <http://doi.org/10.1186/1745-9974-10-1>
- Vlahakis, N. E., Patel, A. M., Maragos, N. E., & Beck, K. C. (2002). Diagnosis of Vocal Cord Dysfunction. *Chest*, 122(6), 2246–2249. <http://doi.org/10.1378/chest.122.6.2246>
- Walaschek, C., Forster, J., & Echternach, M. (2010). Vocal cord dysfunction without end? *Klinische Pädiatrie*, 222(2), 84–85. <http://doi.org/10.1055/s-0029-1242763>
- Walsted, E. S., Hull, J. H., Sverrild, A., Porsbjerg, C., & Backer, V. (2016). Bronchial provocation testing does not detect exercise-induced laryngeal obstruction. *The Journal of Asthma : Official Journal of the Association for the Care of Asthma*, 0. <http://doi.org/10.1080/02770903.2016.1195843>
- Warburton, C. J., McL Niven, R., Higgins, B. G., & Pickering, C. A. (1996). Functional upper airways obstruction: two patients with persistent symptoms. *Thorax*, 51(9), 965–966. Retrieved from [/pmc/articles/PMC472628/?report=abstract](http://pmc/articles/PMC472628/?report=abstract)
- Wareing, M. J., & Mitchell, D. (1997). Psychogenic stridor: diagnosis and management. *Journal of Accident & Emergency Medicine*, 14(5), 330–332. Retrieved from [/pmc/articles/PMC1343103/?report=abstract](http://pmc/articles/PMC1343103/?report=abstract)
- Weinstein, D. J., Hull, J. E., Ritchie, B. L., Hayes, J. A., & Morris, M. J. (2016). Exercise-Associated Excessive Dynamic Airway Collapse in Military Personnel. *Annals of the American Thoracic Society*. <http://doi.org/10.1513/AnnalsATS.201512-790OC>
- Weir, M. (2002). Vocal Cord Dysfunction Mimics Asthma and May Respond to Heliox, 41(1), 37–41. <http://doi.org/10.1177/000992280204100108>
- Wolfe, J. M., & Meth, B. M. (1999). Vocal cord dysfunction mimicking a severe asthma attack. *The Journal of Emergency Medicine*, 17(1), 39–41. Retrieved from <http://eutils.ncbi.nlm.nih.gov/entrez/eutils/efetch.fcgi?dbfrom=pubmed&id=9950385&retmode=ref&cmd=prlinks>
- Wood, R. P., Jafek, B. W., & Cherniack, R. M. (1986). Laryngeal dysfunction and pulmonary disorder. *Otolaryngology - Head and Neck Surgery*, 94(3), 374–378. Retrieved from <http://eutils.ncbi.nlm.nih.gov/entrez/eutils/efetch.fcgi?dbfrom=pubmed&id=3083369&retmode=ref&cmd=prlinks>
- Woolnough, K., Blakey, J., Pargeter, N., & Mansur, A. (2013). Acid suppression does not reduce symptoms from vocal cord dysfunction, where gastro-laryngeal reflux is a known trigger. *Respirology (Carlton, Vic.)*, 18(3), 553–554. <http://doi.org/10.1111/resp.12058>
- Young, O., & Russell, J. R. (2008). Suture lateralization of vocal cord treating paradoxical vocal cord movement: a case report. *European Archives of Oto-Rhino-Laryngology : Official Journal of the European Federation of Oto-Rhino-Laryngological Societies (EUFOS) : Affiliated with the German Society for Oto-Rhino-Laryngology - Head and Neck Surgery*, 265(4), 485–487. <http://doi.org/10.1007/s00405-007-0472-0>
- Zelcer, S., Henri, C., Tewfik, T. L., & Mazer, B. (2002). Multidimensional voice program analysis (MDVP) and the diagnosis of pediatric vocal cord dysfunction. *Annals of Allergy, Asthma & Immunology*, 88(6), 601–608. [http://doi.org/10.1016/S1081-1206\(10\)61892-3](http://doi.org/10.1016/S1081-1206(10)61892-3)
